# Supplementary material for: Exploring programmatic indicators of tuberculosis control that incorporate routine Mycobacterium tuberculosis sequencing in low incidence settings: a comprehensive (2017–2021) patient cohort analysis
Source: PubMed Central journal article supplement — Lancet Reg Health West Pac. 2023 Sep 27;41:100910. doi: 10.1016/j.lanwpc.2023.100910 (PMC10550799; doi:10.1016/j.lanwpc.2023.100910), 2023-09-27

**Exploring programmatic indicators of tuberculosis control that incorporate routine *Mycobacterium tuberculosis* sequencing in low incidence settings: a comprehensive (2017 to 2021) patient cohort analysis**

**Supplementary Figures**

| <b>Content</b>                                                                                                                                        | <b>Page</b> |
|-------------------------------------------------------------------------------------------------------------------------------------------------------|-------------|
| Figure S1: Flowchart of TB cases included in the study                                                                                                | 1           |
| Figure S2: Frequency of mutations detected in the <i>pncA</i> gene and association with phenotypic pyrazinamide resistance                            | 2           |
| Figure S3: Frequency of mutations detected in the <i>embB</i> gene and association with phenotypic ethambutol resistance                              | 3           |
| Figure S4: <i>M. tuberculosis</i> transmission clusters identified* over the 5-year study period – using a 0 SNP cut-off                              | 4           |
| Figure S5: <i>M. tuberculosis</i> transmission clusters identified* over the 5-year study period – using a 12 SNP cut-off                             | 5           |
| Figure S6: The proportion of TB isolates within identified clusters using a 0-SNP, 2- SNP, and 5-SNP cut-offs over a rolling 2-year clustering review | 6           |

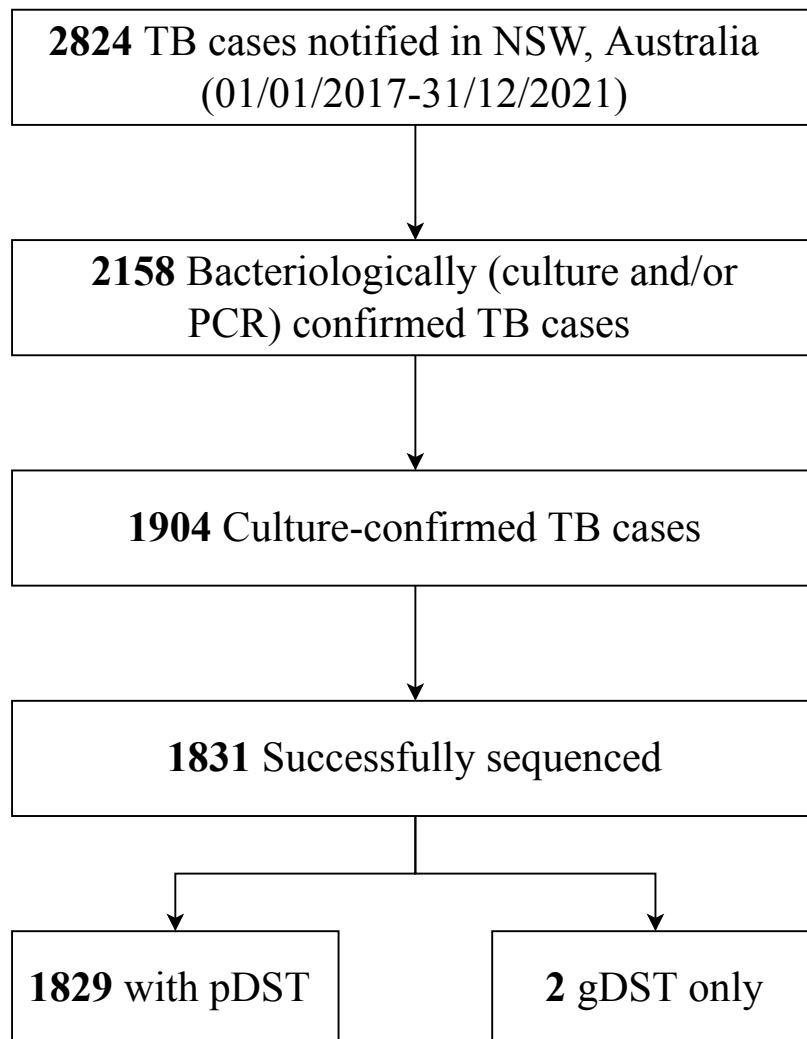

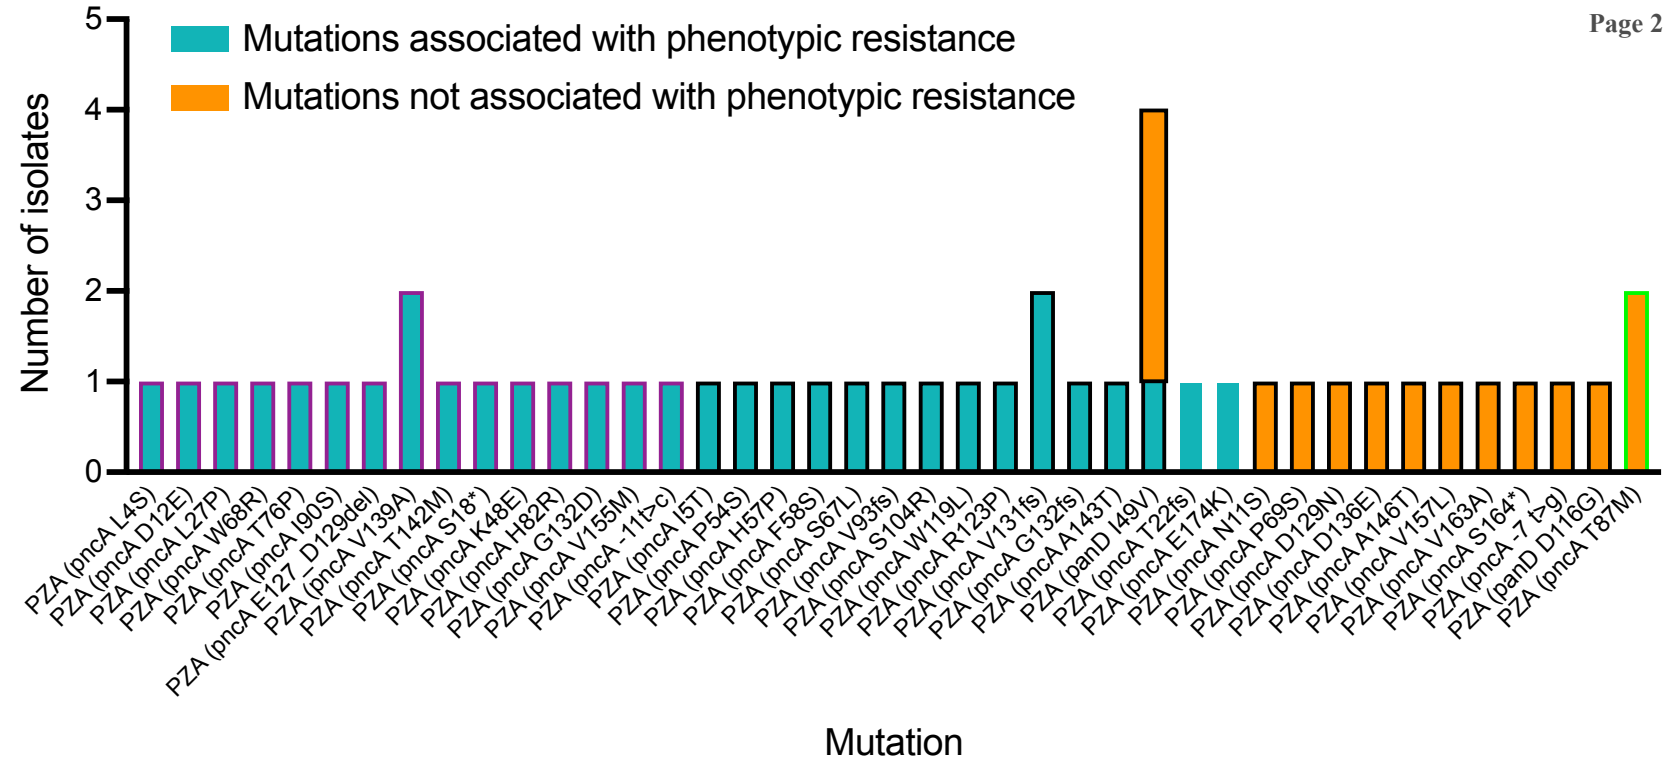

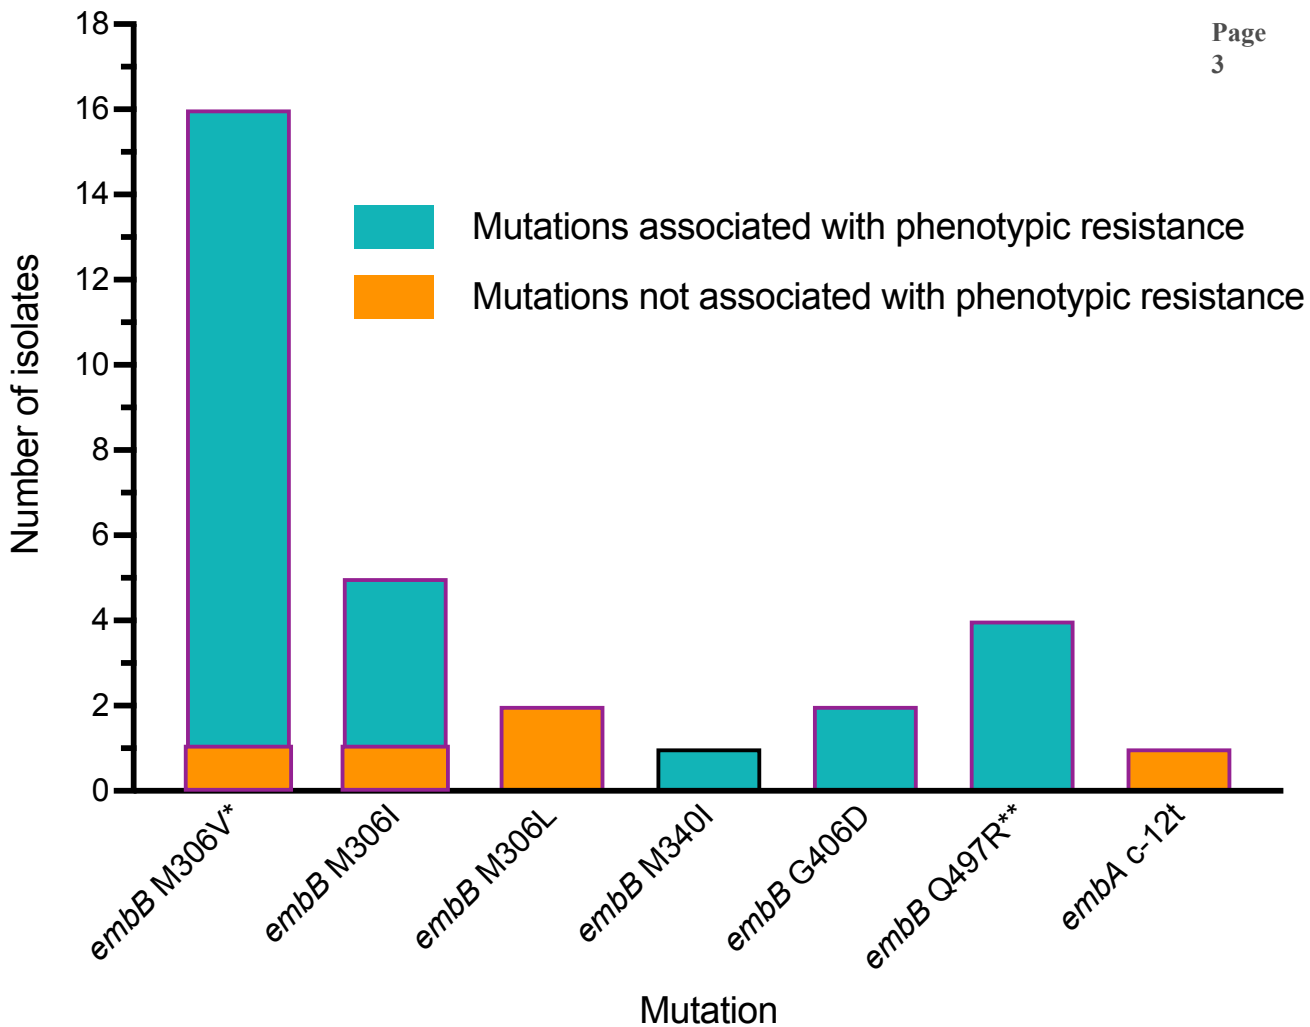

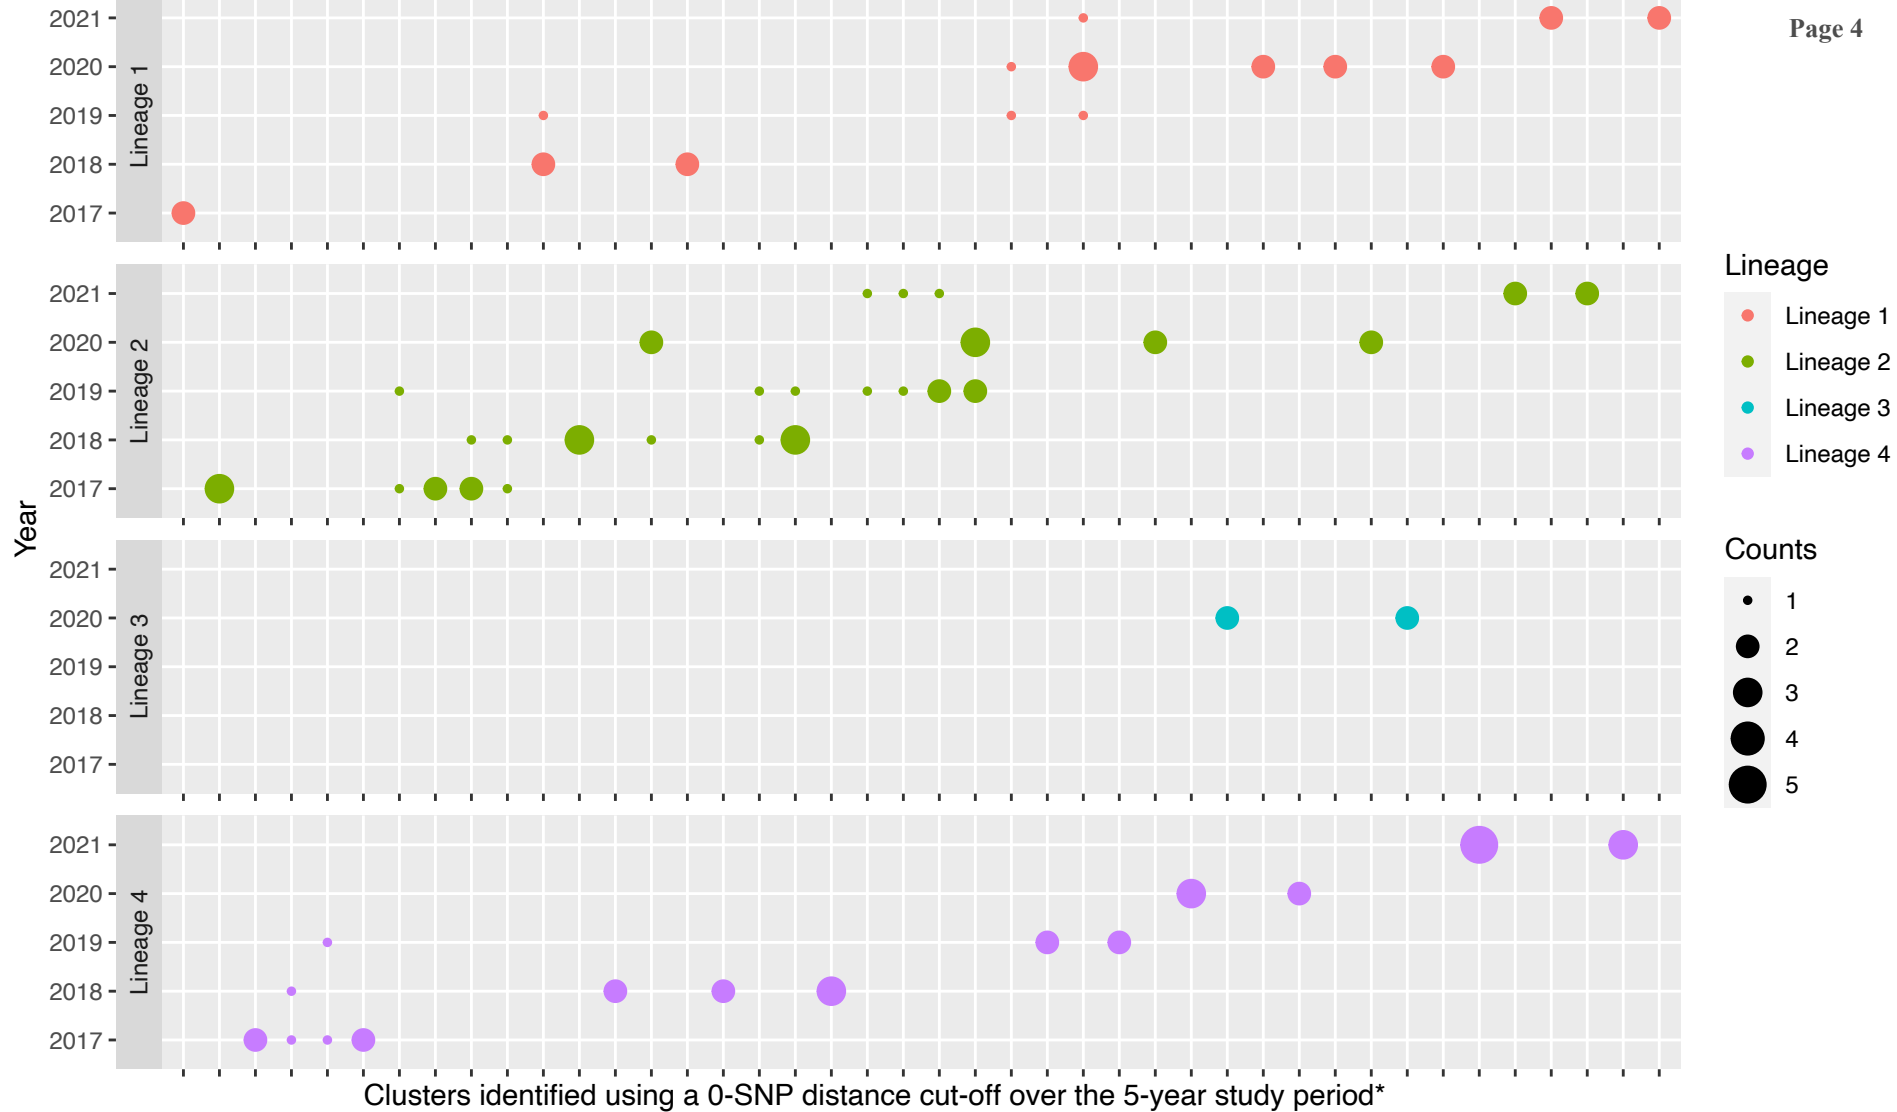

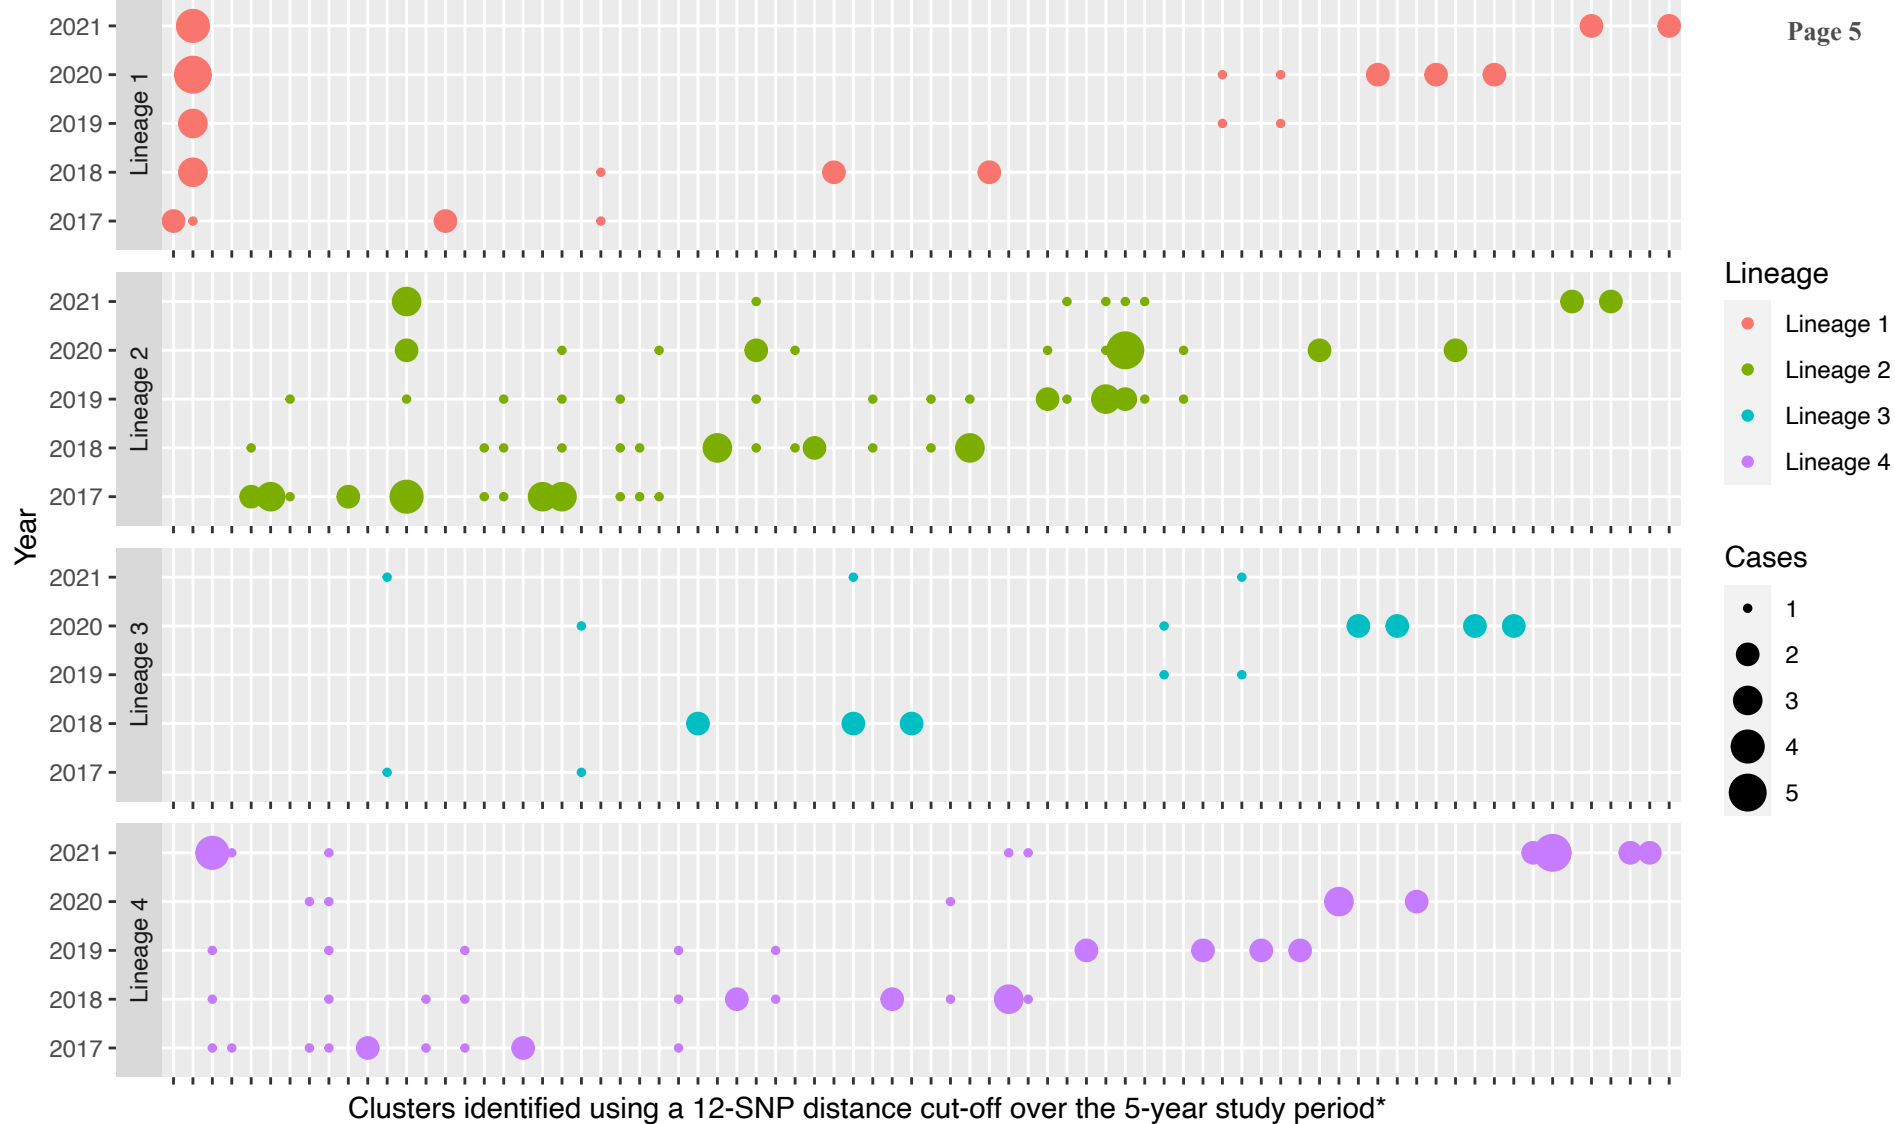

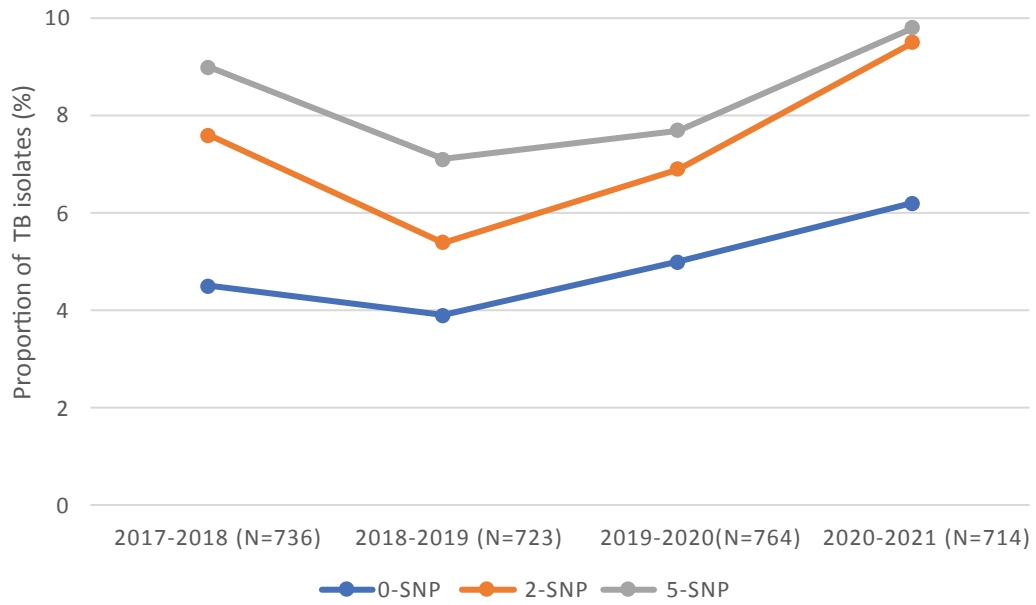

Supplement: mmc1.pdf [file mmc1.pdf]
